# Supplementary material for: The ZmbHLH47-ZmSnRK2.9 Module Promotes Drought Tolerance in Maize
Source: Int J Mol Sci. 2024 May 1;25(9):4957. doi: 10.3390/ijms25094957 (PMC11084430; doi:10.3390/ijms25094957)
Supplement: Supplementary file 1 [file ijms-25-04957-s001.zip › Table S1.xls]

## Sheet: Table S1
Table S1. Primers used in this study.
Primer Name	Primer Sequences (5'-3')
For subcellular localization assay
ZmbHLH47-pSuper1300-GFP-F	CAAATCGACTCTAGAATGGTGGCTGACACGGAAAG
ZmbHLH47-pSuper1300-GFP-R	CATGGTACCGGATCCCCCGTCCCGCCGTTCCTCT
D53-pSuper1300-mCherry-F	GCAAGCTTATGCCCACTCCGGTGGCC
D53-pSuper1300-mCherry-R	GCACTAGTACAATCTAGAATTATTCTTGGCGG
For transcriptional activity assay
pGBKT7-ZmbHLH47-F	GCCGAATTCATGGTGGCTGACACGGAAAG
pGBKT7-ZmbHLH47-R	CGGGTCGACCTACCCGTCCCGCCGTTCCTCT
pGBKT7-ZmbHLH47-(N+bHLH)-R	CGGGTCGACTTCCGATATTTGGGACTTGAGC
pGBKT7-ZmbHLH47-N-R	CGGGTCGACTCGATCAAGATCTAGCATACTGCC
pGBKT7-ZmbHLH47-(bHLH+C)-F	GCCGAATTCCAAAACACTGGAAAGGCTACAG
pGBKT7-ZmbHLH47-C-F	GCCGAATTCCTACAAACCGAGCTCTGCGC
ZmSnRK2.9p-pGreenII0800-F	TTCCTGCAGCCCGGGGCTTCTAGTGGAAGTAGACCAAT
ZmSnRK2.9p-pGreenII0800-R	CGCTCTAGAACTAGTAATAAAAATATTACGATACAGTT
ZmbHLH47-pSuper1300-GFP-F	CAAATCGACTCTAGAATGGTGGCTGACACGGAAAG
ZmbHLH47-pSuper1300-GFP-R	CATGGTACCGGATCCCCCGTCCCGCCGTTCCTCT
For yeast one-hybird assay
ZmSnRK2.9p-pHis2.1-F	GACTCACTATAGGGCTCTCATTTTCACTCCCTATTTC
ZmSnRK2.9p-pHis2.1-R	TCCACGCGTGAGCTCGAATCGAGGGCACCGGTTAG
ZmbHLH47-pGADT7-F	GCCATGGAGGCCAGTATGGTGGCTGACACGGAAAG
ZmbHLH47-pGADT7-R	ATGCCCACCCGGGTGCTACCCGTCCCGCCGTTCCTCT
For ChIP-qPCR
P1-F	TCTCATTTTCACTCCCTATTTCAA
P1-R	CGCGGGCAGGCGGCAGCC
P2-F	CCCGCCTCCACGGCTCCGCC
P2-R	TCAACTAAATAGCTCTTCAAATCTG
P3-F	GCTTCTAGTGGAAGTAGACCAA
P3-R	AATAAAAATATTACGATACAGT
P4-F	CATCGTTGCGTTAGCAACACCT
P4-R	AATTTAGGCCGGCTGGGGTTTG
P5-F	TTAATCATCACGTCAGACATCA
P5-R	GAATCGAGGGCACCGGTTAGTG
For EMSA
Probe / Wild type competitor-F	TCTTATTTCACTTGTTCAACAATA
Probe / Wild type competitor-R	TATTGTTGAACAAGTGAAATAAGA
Mut competitor-F	TCTTATTTACAAGCTTCAACAATA
Mut competitor-R	TATTGTTGAAGCTTGTAAATAAGA
ZmbHLH47-pET30a-F	GCCATGGCTGATATCATGGTGGCTGACACGGAAAG
ZmbHLH47-pET30a-R	TGCGGCCGCAAGCTTCTACCCGTCCCGCCGTTC
For qRT-PCR
Actin1-F	ATGTTTCCTCCCATTGCCGAT
Actin1-R	CCAGTTTCGTCATACTCTCCCTTG
ZmbHLH47-F	AACAATCTGCTCTTGTATCGGA
ZmbHLH47-R	GATATTTGGGACTTGAGCGAAC
ZmRAB18-F	GTGGTGGGTTGAGGGGAAGGAAGC
ZmRAB18-R	ACGCCATCGCCGTTGAGCCT
ZmABF2-F	TTGTGCCTCCACTGCAATTCGG
ZmABF2-R	TTACAAGTCGTCTCCCTCCATCTTCC
ZmABI4-F	GACTTCGTTTCATCATGAGGTG
ZmABI4-R	GACTTCGTTTCATCATGAGGTG
ZmPYL1-F	CTGGGAAATGGTCTCTCTGAAT
ZmPYL1-R	CACTCGCGTAAAGCTGAAATTA
ZmPYL2-F	TCATCTCAGCGAATCCAATCGA
ZmPYL2-R	CGCAGCTCCGGATGAAGTGCT
ZmPYL3-F	ACCTCTTCATCGGCCAATTAAT
ZmPYL3-R	CTTGGACGCAATGGATTAGC
ZmPYL4-F	CCTAGAGAGACGAGACCAGAC
ZmPYL4-R	TAGAACCTCAATCGAGTTCACG
ZmPYL5-F	CATGGGTGATCTGATCGATAGT
ZmPYL5-R	CTTGGATCTCTACGGATCGATT
ZmPYL6-F	AGAGACGATCAACAAGATGACA
ZmPYL6-R	AAGTTTCATGCTCTCCACAAAC
ZmPYL7-F	AGATGATCAATCTCCTACGGAT
ZmPYL7-R	GTTGTTTCTCTCTGCAAAGGAG
ZmPYL8-F	GACCAACAACAAAAACCGACTA
ZmPYL8-R	CCGTTTACTTTTGCTTGCTTGT
ZmPYL9-F	CAAACAAGCAAGCAAGTAAACG
ZmPYL9-R	CTTGACGAGGGTGGAAGTAC
ZmPYL10-F	TGATCAACCACAGCTTTTCAAG
ZmPYL10-R	CAAATCTGACGCTGAGTATGTG
ZmPYL11-F	GATGAAGGGGAACATCGAGATC
ZmPYL11-R	TGAGGATGGAGGAGTAGTTCTG
ZmPYL12-F	CTAGGAGATGAACAACCTCAGG
ZmPYL12-R	GGAGATAGCCGACATCATCTTT
ZmPYL13-F	TTCTTTCGTCGTTGGTACTGTA
ZmPYL13-R	GAAAGGGAAGACAAACAACCTC
ZmPP2C-A1-F	AGGACACGGTCTCCATCAG
ZmPP2C-A1-R	TTGTCCTGGCACATCGTC
ZmPP2C-A2-F	CACCAGCAAACAGCACTTCT
ZmPP2C-A2-R	CCAGAACAATCTGCCTTCCT
ZmPP2C-A3-F	AGCTGACCACAAGCCTGAC
ZmPP2C-A3-R	GTAGCTGTCACCGATGGCT
ZmPP2C-A4-F	TACCTGAAGCCGTACGTGTC
ZmPP2C-A4-R	CTCGTTGCTCACCACGTC
ZmPP2C-A5-F	CGGCCGTAACGGCGGCAC
ZmPP2C-A5-R	GCATCTGCGGCTGCCGTG
ZmPP2C-A6-F	TCAAGGTCAATTGGCGACTA
ZmPP2C-A6-R	ATGAACTCGTCTTTGTGCGT
ZmPP2C-A7-F	CTCTCTCCAGCGATCACAAG
ZmPP2C-A7-R	GGTAGTAGTCGCCGATGGAC
ZmPP2C-A8-F	GATGGAGGACACCATCTCG
ZmPP2C-A8-R	CGAAGACCGCGAAGAAGT
ZmPP2C-A9-F	GAAGAGCTCGACCATGAGGT
ZmPP2C-A9-R	CCTCGGCTTCAGGTTCAC
ZmPP2C-A10-F	GTTTCAGCCTGACAGGAAGG
ZmPP2C-A10-R	ACCCTATAGCCGTTCCATTG
ZmPP2C-A11-F	TCGGTGGATCATAAACCTAACA
ZmPP2C-A11-R	ACATTGCAAGAACACCGAAA
ZmPP2C-A12-F	CCTCCAGGTCGCCAACTA
ZmPP2C-A12-R	TCTCCCAGTGCTTCTGAGTG
ZmPP2C-A13-F	GCACTTCTTCGCCGTCTAC
ZmPP2C-A13-R	CCAGTACCTCGTGCATTCTG
ZmSnRK2.1-F	GACTACGTTCGCGTTACAATGG
ZmSnRK2.1-R	CGATGGGCAGATTCTTGAGG
ZmSnRK2.2-F	ATCTGCTGTCTCGGATCTTTGTG
ZmSnRK2.2-R	TTCATCTGGTACTCGTCGGTCA
ZmSnRK2.3-F	AGATATTCGTTGCCGATCCTTC
ZmSnRK2.3-R	GCGTCCTTGTAGTTGGCCTTC
ZmSnRK2.4-F	TTGCCCGTATCTTTGTTGCC
ZmSnRK2.4-R	TCCGTGAGTTCCCGTGGTAG
ZmSnRK2.5-F	CCGACGAAGCAGAGCAACA
ZmSnRK2.5-R	ATGTCGAACTCTCCGCTGGC
ZmSnRK2.6-F	TTGGGCAGAGGAAGAAGAGCA
ZmSnRK2.6-R	GCTGGCATGTACTTGCTTCACC
ZmSnRK2.7-F	GTGTCGCAAGACTGCAAGGAG
ZmSnRK2.7-R	GCTCTCTGGGCAGGTTCTTCA
ZmSnRK2.8-F	CCACCATACCACCTGCCTGTT
ZmSnRK2.8-R	CAATCTCACCGCTGCTGTCAA
ZmSnRK2.9-F	GGACCCAGACGAGCCTAAGAA
ZmSnRK2.9-R	CTGGAGATTAGGTCCTGGCATT
ZmSnRK2.10-F	ATGACAGCACGATGAGCAAGC
ZmSnRK2.10-R	CGGTATCTGAGTCCAGGTCGTC
ZmSnRK2.11-F	GGCTATGGTTACAGTGAAGAATGC
ZmSnRK2.11-R	CGAACCTCCCTAACTGTCTTATCAC
ZmSnRK2.12-F	AGCATGAGCAACCAATATGAGGA
ZmSnRK2.12-R	CGAGAACAGGCAGGTGGTATG
ZmSnRK2.13-F	CTCCTGGCTCGGATCTTCGT
ZmSnRK2.13-R	TTCTTGTAGTACTTCGCTTGCGC
ZmSnRK2.14-F	TATTGCCCGTATCTTTGTTGCC
ZmSnRK2.14-R	TCTCCGTGAGTTCCCGTGGT
ZmZEP1-F	TTGATGTTCGGGAGCCTGAT
ZmZEP1-R	GCAGTAACCTTGAAGCCTGG
ZmNCED3-F	ACTTCTACTTCAGGCCCGAC
ZmNCED3-R	GACGTCTTCTCCCTGTCCAG
ZmAAO4-F	GATGATATCCCCGCTCCCAA
ZmAAO4-R	AAGTGCTTCGTCTCCCATCA
For generating transgenic plants
ZmbHLH47-OE-F	GACTCTAGAGGATCCATGGTGGCTGACACGGAAAG
ZmbHLH47-OE-R	GTCTTTGTAGTCCATCCCGTCCCGCCGTTCCTCTC
ZmSnRK2.9-OE-F	GACTCTAGAGGATCCATGGACCGGGCGGCGCTC
ZmSnRK2.9-OE-R	GTCTTTGTAGTCCATCATAGCGTACACGATCTCCCCG
ZmbHLH47-Crispr-1-F	ATTGAAAGCTCAGATTCACTGCC
ZmbHLH47-Crispr-1-R	AAACGGCAGTGAATCTGAGCTTT
ZmSnRK2.9-Crispr-F	ATTTACGAGCTTGTCCG
ZmSnRK2.9-Crispr-R	AAACGGACAAGCTCGTA
